# Supplementary material for: Phosphorylation of the Ndc80 complex protein, HEC1, by Nek2 kinase modulates chromosome alignment and signaling of the spindle assembly checkpoint
Source: PubMed Central journal article supplement — Mol Biol Cell. 2011 Oct 1;22(19):3584–94. doi: 10.1091/mbc.E11-01-0012 (PMC3183014; doi:10.1091/mbc.e11-01-0012), 2011-10-01
Supplement: supp_E11-01-0012_E11-01-0012_Supplemental_information.pdf [file supp_E11-01-0012_E11-01-0012_Supplemental_information.pdf]

#### Supplemental Figure 1

(A) Unsynchronized U2OS cells were stained with anti-pS165 (green) and anti-Hec1, 9G3, antibodies (red), and DAPI (blue). (B) Dynamic changes of Hec1 pS165 staining during mitotic progression in Ptk2 cells. Cells were immunostained with anti-pS165 (green) and anti-Hec1 antibodies (red), and DAPI (blue). Scale bars, 5  $\mu$ m.

#### Supplemental Figure 2

Western blot analysis of U2OS parental cells and U2OS cells expressing RNAi-resistant Hec1- WT-GFP. The expression of BubR1, Mad1, Mad2, Zw10, and Zwint1 between these two cells were examined with their specific antibodies.  $\beta$ -actin served as a loading control.

#### Supplemental Figure 3

The cold-stability of kinetochore-microtubules is reduced in cells expressing Hec1 S165E but not WT or S165A. Average MT intensity (mean  $\pm$  s.e.m.;  $n > 10$  transfected cells) was measured for each condition. Intensities are normalized against time 0 for each condition (MT intensity at time 0 is 100%). NS, nonsignificant ( $p > 0.05$ ).

#### Supplemental Figure 4

(A) Unsynchronized MCF10A cells were treated with DMSO, 5, 10, or 20  $\mu$ M MPS1-IN-1 inhibitor for 1 hour and stained with anti-pS165 (red) and anti-Hec1, 9G3, antibodies (green), and DAPI (blue). (B) Unsynchronized Ptk2 cells were treated with DMSO, 5, or 10  $\mu$ M MPS1-IN-1 inhibitor for 1 hour and stained with anti-pS165 (red) and anti-Hec1, 9G3, antibodies (green), and DAPI (blue). Scale bars, 5  $\mu$ m.

#### Supplemental Figure 5

U2OS (A), or Ptk2 (B) cells were immunostained with anti-pS165 antibodies (red) and anti-Hec1, 9G3, antibodies (green), using pre-fixation extraction buffer containing either DMSO, 100 nM, or 500 nM of specific phosphatase inhibitor. Cells were counterstained with DAPI (blue). Scale bars, 5  $\mu$ m.

# Supplemental Figure 1 - Wei et al.

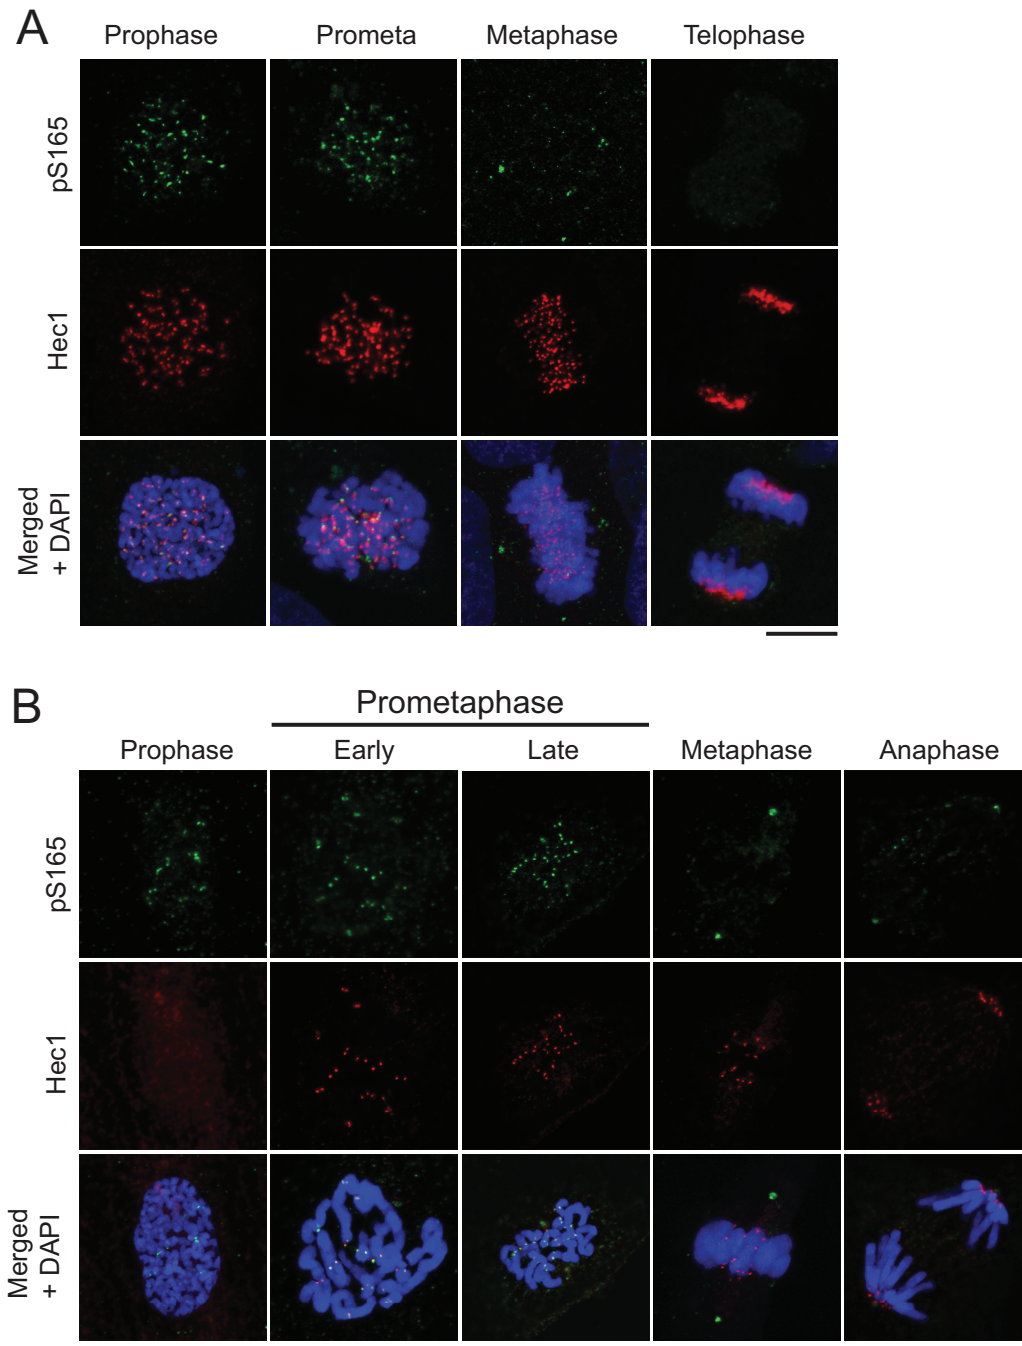

Supplemental Figure 1

(A) Unsynchronized U2OS cells were stained with anti-pS165 (green) and anti-Hec1, 9G3, antibodies (red), and DAPI (blue). (B) Dynamic changes of Hec1 pS165 staining during mitotic progression in Ptk2 cells. Cells were immunostained with anti-pS165 (green) and anti-Hec1 antibodies (red), and DAPI (blue). Scale bars, 5  $\mu$ m.

## Supplemental Figure 2 - Wei et al.

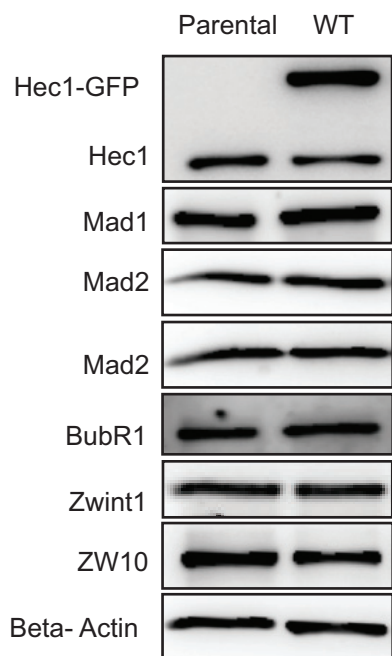

### Supplemental Figure 2

Western blot analysis of U2OS parental cells and U2OS cells expressing RNAi-resistant Hec1- WT-GFP. The expression of BubR1, Mad1, Mad2, Zw10, and Zwint1 between these two cells were examined with their specific antibodies.  $\beta$ -actin served as a loading control.

## Supplemental Figure 3 - Wei et al.

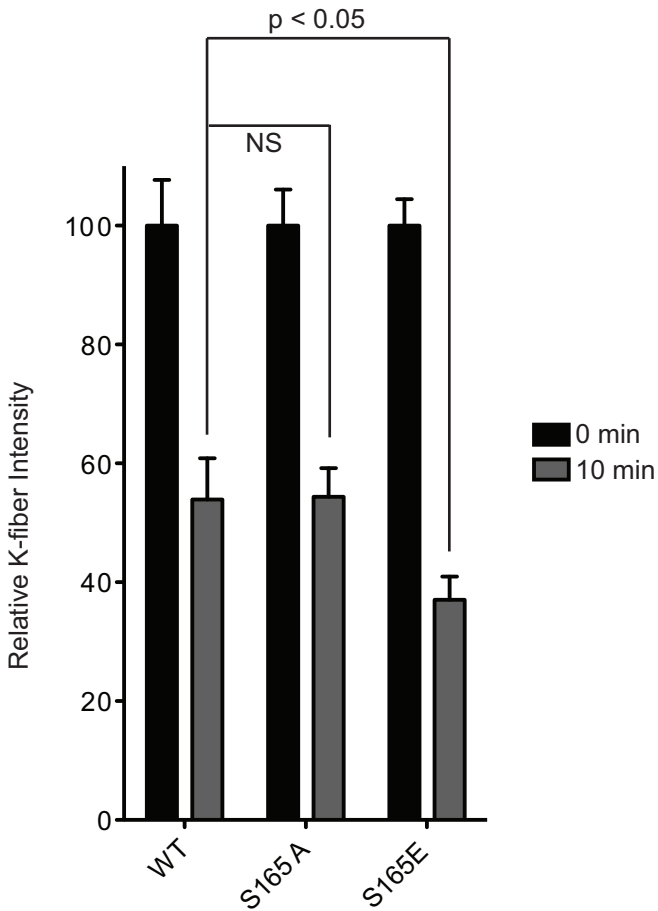

### Supplemental Figure

The cold-stability of kinetochore-microtubules is reduced in cells expressing Hec1 S165E but not WT or S165A. Average MT intensity (mean  $\pm$  s.e.m.;  $n > 10$  transfected cells) was measured for each condition. Intensities are normalized against time 0 for each condition (MT intensity at time 0 is 100%). NS, nonsignificant ( $p > 0.05$ ).

# Supplemental Figure 4 - Wei et al.

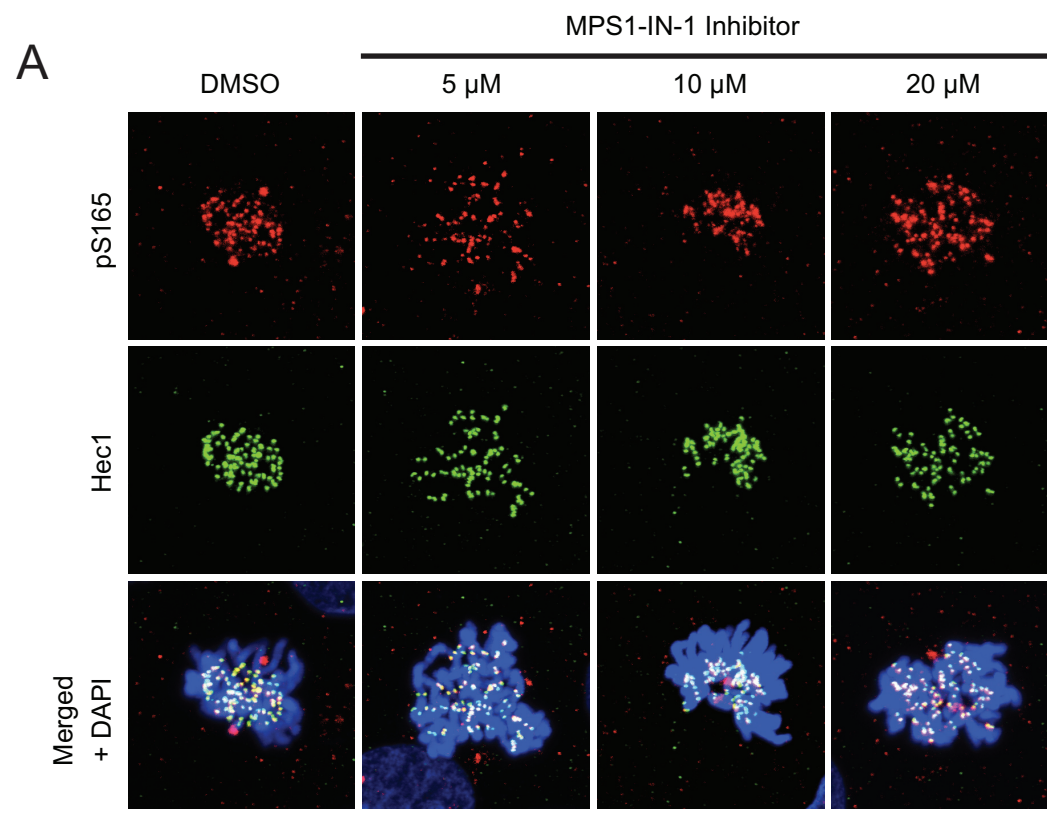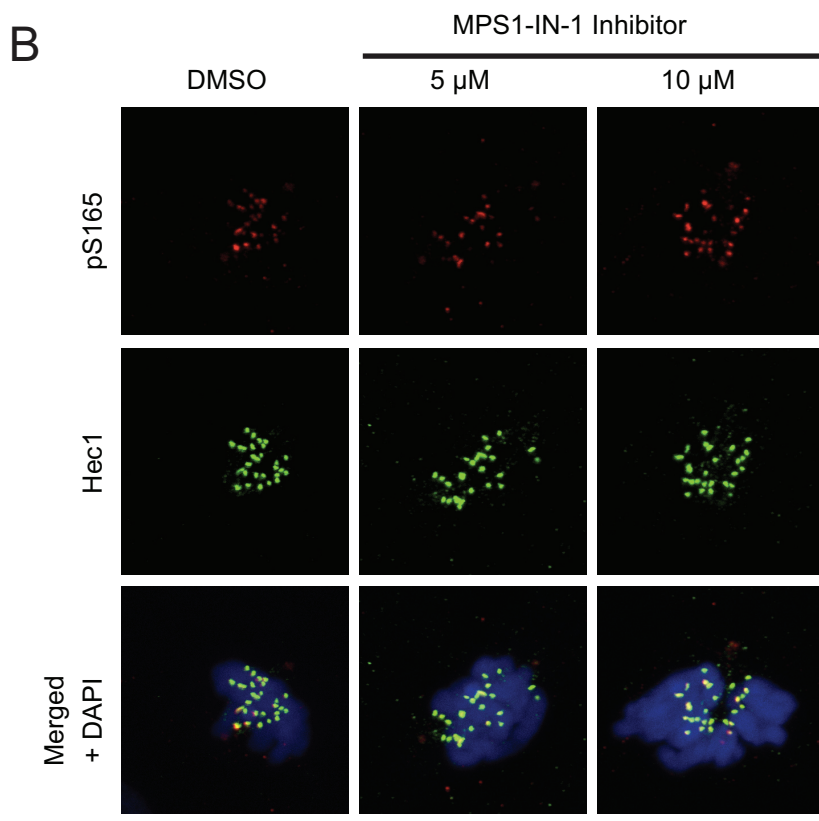

## Supplemental Figure 4

(A) Unsynchronized MCF10A cells were treated with DMSO, 5, 10, or 20  $\mu$ M MPS1-IN-1 inhibitor for 1 hour and stained with anti-pS165 (red) and anti-Hec1, 9G3, antibodies (green), and DAPI (blue). (B) Unsynchronized Ptk2 cells were treated with DMSO, 5, or 10  $\mu$ M MPS1-IN-1 inhibitor for 1 hour and stained with anti-pS165 (red) and anti-Hec1, 9G3, antibodies (green), and DAPI (blue). Scale bars, 5  $\mu$ m.

# Supplemental Figure 5 - Wei et al.

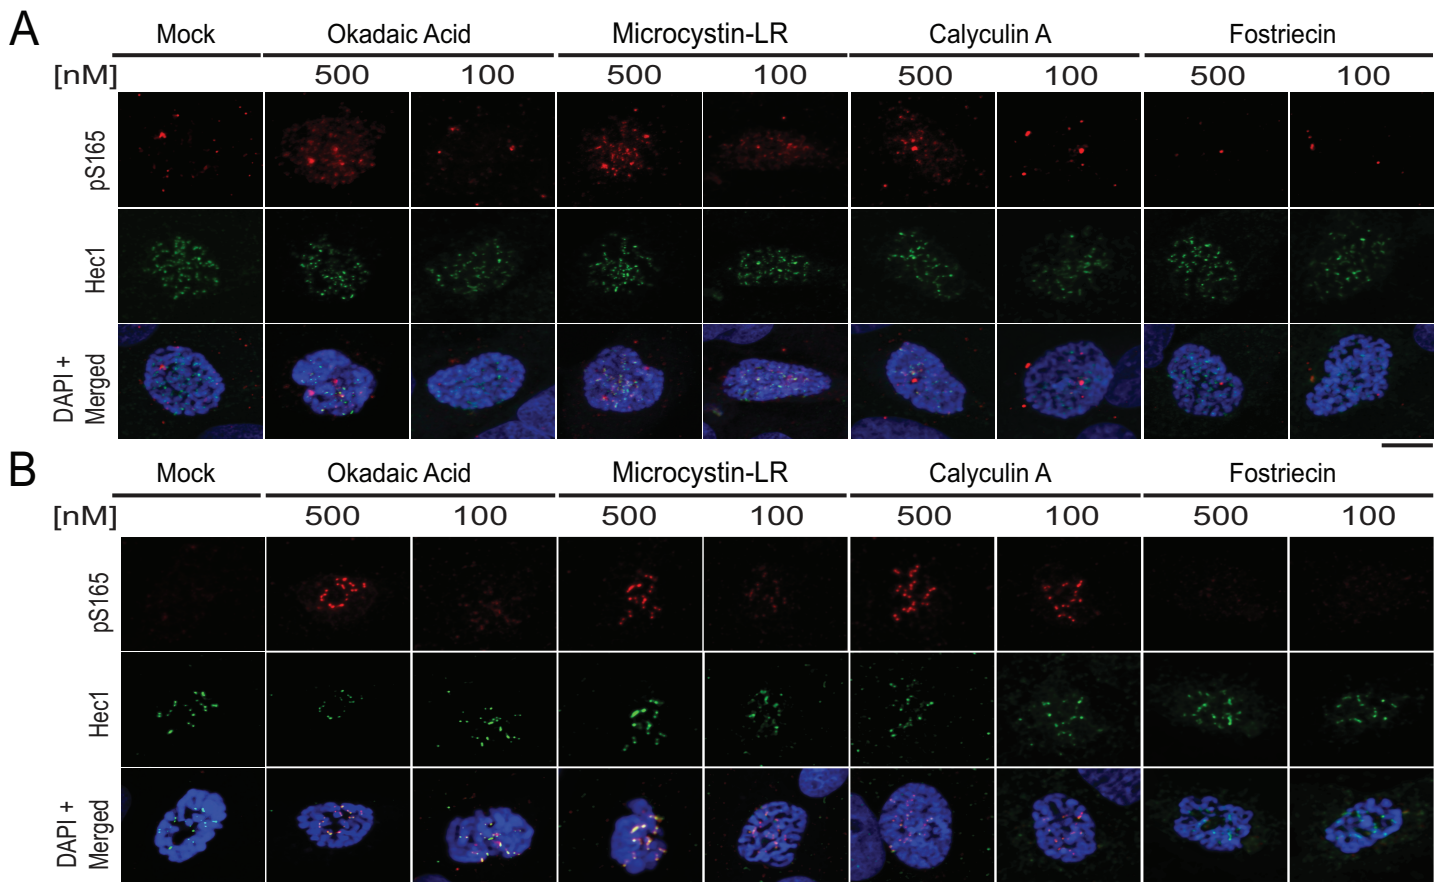

## Supplemental Figure 5

U2OS (A), or Ptk2 (B) cells were immunostained with anti-pS165 antibodies (red) and anti-Hec1, 9G3, antibodies (green), using pre-fixation extraction buffer containing either DMSO, 100 nM, or 500 nM of specific phosphatase inhibitor. Cells were counterstained with DAPI (blue). Scale bars, 5  $\mu$ m.
